# Supplementary material for: Reactive Case Detection Strategy for Malaria Control and Elimination: A 12 Year Systematic Review and Meta-Analysis from 25 Malaria-Endemic Countries
Source: MDPI journal article supplement (doi:10.3390/tropicalmed8030180), 2023-03-18
Supplement: s1 [file s1]

**Table S1: Characteristics of study participants**

| <b>Study (year), country</b>                       | <b>No. of Index cases</b> | <b>&lt; 5 years (%)</b> | <b>Male (%)</b>                                 | <b>No. of contacts screened</b> | <b>&lt; 5 years (%)</b> | <b>Male (%)</b>     | <b>Average contacts /case</b> | <b>Positive among contacts</b>                 | <b>Average number of index cases needed to be traced to find one new case</b> | <b>Average number of contacts needed to be screened to find a new case</b> |
|----------------------------------------------------|---------------------------|-------------------------|-------------------------------------------------|---------------------------------|-------------------------|---------------------|-------------------------------|------------------------------------------------|-------------------------------------------------------------------------------|----------------------------------------------------------------------------|
| Dharmawardena <i>et al.</i> , 2022 [14], Sri Lanka | 70                        | Not reported            | Not reported                                    | 77                              | N/A                     | 72 / 77 (93.5%)     | 1.1                           | Microscopy: 3 / 77 (3.9%)                      | 23.3                                                                          | 25.7                                                                       |
| Okebe <i>et al.</i> , 2021 [15], Gambia            | 85                        | Not reported            | Not reported                                    | 1316                            | Not reported            | Not reported        | 2                             | PCR: 67/1316 (5.1%)                            | 1.3                                                                           | 19.6                                                                       |
| Roh <i>et al.</i> , [16] 2021, Thailand            | 168                       | N/A                     | 166/166 (100%). 166 data available for analysis | 50                              | Not reported            | Not reported        | 0.3                           | Not reported                                   | N/A                                                                           | N/A                                                                        |
| Meredith <i>et al.</i> , 2021 [17], Kenya          | 1,104                     | Not reported            | 488/1042 (46.8%)                                | 3,353                           | Not reported            | 1,380/3,183 (43.4%) | 3.0                           | RDT: 365/3167 (11.6%)<br>PCR: 970/3167 (30.6%) | 114                                                                           | 3.5                                                                        |

|                                                          |            |              |              |        |              |                    |      |                                           |     |      |
|----------------------------------------------------------|------------|--------------|--------------|--------|--------------|--------------------|------|-------------------------------------------|-----|------|
| Gunasekera <i>et al.</i> , 2021 [18], Sri Lanka          | 151        | Not reported | Not reported | 600    | Not reported | Not reported       | 3.9  | 4                                         | 38  | 150  |
| Stratil, <i>et al.</i> , 2021 [19], Cambodia             | 54         | N/A          | Not reported | 1495   | N/A          | Not reported       | 28   | 1                                         | 54  | 1495 |
| Mkali <i>et al.</i> , 2021 [20], Tanzania                | 21,443     | Not reported | Not reported | 85,318 | Not reported | 39616/8 2021 (48%) | 3.9  | Not reported                              | N/A | N/A  |
| Vilakati <i>et al.</i> , 2021 [21], Eswatini (Swaziland) | 53         | Not reported | Not reported | 1455   | Not reported | Not reported       | 27.5 | RDT: 5/1455 (0.4%)<br>LAMP: 6/1316 (0.5%) | 9   | 243  |
| Morales <i>et al.</i> , 2021 [22], Ecuador               | 2 (RACD 1) | Not reported | Not reported | 167    | Not reported | Not reported       | 83.4 | Microscopy: 3/167 (1.8%)                  | 0.6 | 55.7 |
|                                                          | 2 (RACD 2) | Not reported | Not reported | 15     | Not reported | Not reported       | 7.5  | Microscopy: 1/15(6.7%)                    | 2   | 15   |
|                                                          | 1 (RACD 3) | Not reported | Not reported | 62     | Not reported | Not reported       | 62   | Microscopy: 2/62(3.2%)                    | 0.5 | 31   |

|                                             |     |              |               |        |              |                  |      |                                                                                                                          |     |      |
|---------------------------------------------|-----|--------------|---------------|--------|--------------|------------------|------|--------------------------------------------------------------------------------------------------------------------------|-----|------|
| Searle, <i>et al.</i> , 2021 [23], Zambia   | 84  | N/A          | 39/84 (46.4%) | 1701   | N/A          | 783/1701 (46.0%) | 20.3 | RDT/PCR: 145/1701 (8.5%)                                                                                                 | 0.6 | 11.7 |
| Tessema <i>et al.</i> , 2020 [24], Ethiopia | 18  | Not reported | Not reported  | 499    | Not reported | Not reported     | 27.7 | RDT: 43(8.8%)<br>Pf., 14(2.9%)<br>Pv, 7(1.4%)<br>mixed 111/460 (24.1%)<br>PCR: 47(10.2%)<br>Pf, 55(11.9%)<br>Pv, 9(2.0%) | 0.2 | 4.5  |
| Bridges <i>et al.</i> , 2020 [25], Zambia   | 428 | Not reported | Not reported  | 11,954 | Not reported | Not reported     | 27.9 | RDT: 206/11954 (1.7%)                                                                                                    | 2.1 | 58   |
| Conner, <i>et al.</i> , 2020 [26], Senegal  | 13  | Not reported | Not reported  | 833    | Not reported | Not reported     | 64.1 | RDT: 18/826 (2.2%)                                                                                                       | 0.7 | 46.3 |
| Grossenbacher <i>et al.</i> ,               | 156 | Not reported | Not reported  | 4590   | Not reported | Not reported     | 29.4 | PCR: 78/4590                                                                                                             | 2   | 58.8 |

|                                                              |      |                   |                    |              |                |                           |      |                                                           |      |      |
|--------------------------------------------------------------|------|-------------------|--------------------|--------------|----------------|---------------------------|------|-----------------------------------------------------------|------|------|
| 2020 [27],<br>Tanzania                                       |      |                   |                    |              |                |                           |      | (1.7%)                                                    |      |      |
| Daniels <i>et al.</i> , 2020 [28],<br>Senegal                | 673  | Not reported      | Not reported       | Not reported | Not reported   | Not reported              | N/A  | RDT: 86<br>secondary<br>infections                        | 7.8  | N/A  |
| Canavati <i>et al.</i> , 2020 [29],<br>Vietnam               | 110  | N/A               | 90/110<br>(81.8%)  | 197          | N/A            | 143/197<br>(72.6%)        | 1.8  | RDT: 0/197<br>(0.0%)                                      | 110  | 197  |
| Hsiang <i>et al.</i> , 2020 [30],<br>Namibia                 | 984  | Not reported      | Not reported       | 4701         | Not reported   | Not reported              | 4.8  | RDT:<br>114/4701<br>(2.4%)<br>LAMP: 178/<br>4286 (4.2%)   | 5.5  | 26.4 |
| Kheang <i>et al.</i> , 2020 [31],<br>Cambodia.               | 408  | Not reported      | Not reported       | 1377         | Not reported   | Not reported              | 3.4  | 14/395<br>(3.5%)                                          | 29.1 | 98.4 |
| Hsiang <i>et al.</i> , 2020 [32],<br>Eswatini<br>(Swaziland) | 1163 | Not reported      | Not reported       | 10 890       | Not reported   | 4399/<br>10446<br>(42.1%) | 9.4  | RDT:<br>59/9983<br>(0.6%)<br>LAMP:<br>180/10446<br>(1.7%) | 6.5  | 60.5 |
| Stuck <i>et al.</i> , 2020 [33],                             | 418  | 59/418<br>(14.1%) | 239/418<br>(57.2%) | 17,458       | 2859<br>/17458 | 8087/<br>17458            | 41.8 | RDT:<br>104/12478                                         | 2.8  | 118  |

|                                                            |     |                    |                    |       |                 |                         |      |                                                         |       |        |
|------------------------------------------------------------|-----|--------------------|--------------------|-------|-----------------|-------------------------|------|---------------------------------------------------------|-------|--------|
| Tanzania                                                   |     |                    |                    |       | (16.4%)         | (46.3%)                 |      | (0.8%)<br>PCR:<br>148/6281<br>(2.4%)                    |       |        |
| Bhondoeckha<br>n <i>et al.</i> ,<br>2020 [34],<br>Zambia   | 158 | Not<br>reported    | Not<br>reported    | 4170  | Not<br>reported | Not<br>reported         | 26.4 | RDT/PCR:<br>153/4170<br>(3.7%)                          | 1.0   | 27.3   |
| Bekolo and<br>Williams,<br>2019 [35],<br>Cameroon          | 176 | 132/176<br>(75.0%) | 107/176<br>(60.8%) | 290   | Not<br>reported | 124 /<br>249<br>(49.8%) | 1.6  | RDT:<br>249/290<br>(85.9%)                              | 0.7   | 1.2    |
| Melese <i>et al.</i> , 2019<br>[36],<br>Ethiopia           | 20  | Not<br>reported    | Not<br>reported    | 270   | Not<br>reported | Not<br>reported         | 13.5 | Microscopy:<br>14/270<br>(5.2%)<br>PCR: 11/92<br>(12.0) | 1.8   | 24.5   |
| Aidoo <i>et al.</i> ,<br>2018 [37],<br>Kenya               | 50  | Not<br>reported    | Not<br>reported    | 1280  | 230<br>(17.9%)  | 498<br>(38.9%)          | 26   | PCR:<br>144/1280<br>(11%)                               | 0.35  | 8      |
| Deutsch<br>Feldman <i>et al.</i> ,<br>2018 [38],<br>Zambia | 145 | Not<br>reported    | Not<br>reported    | 3,333 | Not<br>reported | Not<br>reported         | 23   | RDT:<br>33/3016<br>(1.1%),<br>PCR:<br>73/3016<br>(2.4%) | 2     | 46     |
| Kyaw <i>et al.</i> ,<br>2018 [39],                         | 312 | Not<br>reported    | 238/312<br>(76.3)  | 1185  | Not<br>reported | Not<br>reported         | 4    | RDT:<br>0/1185 (0%)                                     | > 321 | > 1284 |

|                                              |     |              |                 |        |              |              |      |                                                          |     |      |
|----------------------------------------------|-----|--------------|-----------------|--------|--------------|--------------|------|----------------------------------------------------------|-----|------|
| Myanmar                                      |     |              |                 |        |              |              |      |                                                          |     |      |
| Zelman <i>et al.</i> , 2018 [40] , Indonesia | 36  | Not reported | Not reported    | 1495   | Not reported | Not reported | 42   | PCR: 6/1495 (0.4%)                                       | 6   | 252  |
| Bansil <i>et al.</i> , 2018 [41], Ethiopia   | 220 | Not reported | 192 (87.3%)     | 3243   | Not reported | Not reported | 15   | 127/3243 (3.9%)<br>RDT: (2.2% P.f., 0.5% Pv, 1.2% mixed) | 2   | 25   |
| Feng <i>et al.</i> , 2018 [42] , China       | 26  | Not reported | Not reported    | 84     | Not reported | Not reported | 3    | 4 /84 (4.8%)                                             | 6   | 18   |
| Zemene <i>et al.</i> , 2018 [43] Ethiopia    | 39  | Not reported | Not reported    | 726    | 144 (19.8%)  | 322 (44.4%)  | 19   | Microscopy: 29/726 (4.0%)<br>PCR: 54/603 (8.96%)         | 1   | 13   |
| Naeem <i>et al.</i> , 2018 [44], Pakistan    | 200 | Not reported | Not reported    | 800    | Not reported | Not reported | 4.0  | Microscopy: 6/800 (0.8%)<br><br>PCR: 40/800 (5.0%)       | 5.0 | 20   |
| Zhang <i>et al.</i> , 2018 [45], China       | 863 | Not reported | 778/863 (90.2%) | 41,560 | Not reported | Not reported | 48.2 | 10 / 3461 (0.3%)                                         | 0.0 | 4156 |
| Rossi <i>et al.</i> , 2018 [46],             | 194 | Not reported | Not reported    | 785    | Not reported | Not reported | 4    | RDT : 7/ 785 (0.9%)                                      | 6   | 25   |

|                                                                 |      |                     |                 |        |                          |                          |     |                                                         |      |      |
|-----------------------------------------------------------------|------|---------------------|-----------------|--------|--------------------------|--------------------------|-----|---------------------------------------------------------|------|------|
| Cambodia                                                        |      |                     |                 |        |                          |                          |     | PCR : 31/<br>785 (3.9%)                                 |      |      |
| Larsen <i>et al.</i> ,<br>2017 [47] ,<br>Zambia                 | 854  | Not<br>reported     | Not<br>reported | 14,409 | Not<br>reported          | Not<br>reported          | 17  | RDT: 1200 /<br>14409<br>(8.3%)                          | 0.7  | 12   |
| Wang <i>et al.</i> ,<br>2017 [48],<br>China                     | 260  | Not<br>reported     | Not<br>reported | 3662   | Not<br>reported          | Not<br>reported          | 14  | RDT:<br>10/3662<br>(0.3%)                               | 26   | 364  |
| Smith <i>et al.</i> ,<br>2017 [49],<br>Namibia                  | 146  | Not<br>reported     | Not<br>reported | 3,151  | 503<br>(15.9%)           | 1411<br>(44.8)           | 22  | RDT : 23/<br>3151 (0.7%)<br>LAMP: 47/<br>3151<br>(1.5%) | 3    | 67   |
| Molina<br>Gómez<br><i>et al.</i> , 2017<br>[50]<br>Colombia     | 8    | Not<br>reported     | Not<br>reported | 175    | Not<br>reported          | Not<br>reported          | 22  | Microscopy:<br>4.6%<br>PCR: 8%                          | 1    | 12   |
| Tejedor-<br>Garavito <i>et al.</i> , 2017<br>[51],<br>Swaziland | 1517 | Not<br>reported     | Not<br>reported | 9859   | 1813/97<br>54<br>(18.6%) | 6606/98<br>59<br>(67.0%) | 6.5 | RDT:<br>105/9859<br>(1.1%)                              | 14.4 | 93.9 |
| Hamze <i>et al.</i> , 2016                                      | 100  | 100/100<br>(100.0%) | Not<br>reported | 362    | Not<br>reported          | Not<br>reported          | 3.6 | RDT:<br>29/362                                          | 3.4  | 12.5 |

|                                                     |     |                 |                 |       |                 |                     |      |                                                       |     |       |
|-----------------------------------------------------|-----|-----------------|-----------------|-------|-----------------|---------------------|------|-------------------------------------------------------|-----|-------|
| [52],<br>Democratic<br>Republic of<br>Congo         |     | )               |                 |       |                 |                     |      | (8.0%)                                                |     |       |
| Hustedt <i>et al.</i> ,<br>2016 [53],<br>Cambodia   | 270 | Not<br>reported | Not<br>reported | 1898  | Not<br>reported | Not<br>reported     | 7    | RDT:<br>9/1898<br>(0.5%)<br>PCR:<br>17/1596<br>(1.1%) | 16  | 110   |
| Fontoura <i>et al.</i> ,<br>2016 [54],<br>Brazil    | 41  | Not<br>reported | Not<br>reported | 1,923 | Not<br>reported | 1,037 ( 53.9%)      | 47   | Microscopy<br>and PCR:<br>108 & 293                   | 0.1 | 6     |
| Chihanga <i>et al.</i> , 2016<br>[55],<br>Botswana  | 227 | Not<br>reported | Not<br>reported | 3237  | Not<br>reported | Not<br>reported     | 14.3 | 37/3237<br>(1.1%)                                     | 6.1 | 87.5  |
| Donald <i>et al.</i> , 2016<br>[56],<br>Vanuatu     | 2   | Not<br>reported | Not<br>reported | 173   | Not<br>reported | Not<br>reported     | 86.5 | PCR: 1/173<br>(0.6%)                                  | 2   | 173   |
| Herdiana <i>et al.</i> , 2016<br>[57],<br>Indonesia | 38  | Not<br>reported | Not<br>reported | 1495  | Not<br>reported | 653/1495<br>(43.7%) | 39.3 | LAMP/<br>PCR:<br>6/1495<br>(0.4%)                     | 6.3 | 249.2 |
| Searle <i>et al.</i> ,<br>2016 [58],<br>Zambia      | 26  | Not<br>reported | Not<br>reported | 428   | Not<br>reported | Not<br>reported     | 16   | RDT:<br>50/428<br>(12%)                               | 1   | 8     |
| van Eijk <i>et al.</i> ,                            | 18  | 0 (0 %)         | 13 (72.2 %)     | 868   | 44 (5.1 %)      | 342 (39.4           | 48   | Microscopy<br>and PCR:                                | 5   | 216   |



|                                                             |                     |                    |                    |      |                  |                  |       |                                            |     |      |
|-------------------------------------------------------------|---------------------|--------------------|--------------------|------|------------------|------------------|-------|--------------------------------------------|-----|------|
| 2016 [59] ,<br>Chennai<br>(India)                           |                     |                    |                    |      |                  | %)               |       | 4/868 (0.5<br>%, 3 Pv, 1<br>Pf<br>)        |     |      |
| van Eijk <i>et al.</i> ,<br>2016 [59],<br>Nadiad<br>(India) | 20                  | 1 (5.0<br>%)       | 14 (70.0<br>%)     | 131  | 2 (1.5<br>%)     | 53 (40.5<br>%)   | 7     | Microscopy<br>and PCR:<br>0/131 (0.0<br>%) | >20 | >140 |
| Wangdi, <i>et al.</i> , 2016<br>[60], Bhutan                | 5                   | Not<br>reported    | Not<br>reported    | 728  | Not<br>reported  | Not<br>reported  | 145.6 | Not reported                               | N/A | N/A  |
| Larson <i>et al.</i> , 2016<br>[61],<br>Zambia              | Not<br>reporte<br>d | Not<br>reported    | Not<br>reported    | 167  | Not<br>reported  | Not<br>reported  | N/A   | 32/167<br>(19.2%)                          | N/A | 5.2  |
| Pinchoff <i>et al.</i> ,<br>2015 [62],<br>Zambia            | 426                 | 185<br>(43.4<br>%) | 228<br>(53.5<br>%) | 1621 | Not<br>reported  | Not<br>reported  | 4     | RDT:<br>735/1621<br>(45.3<br>%)            | 1   | 2    |
| Larsen <i>et al.</i> ,<br>2015 [63],<br>Zambia              | 144                 | Not<br>reported    | Not<br>reported    | 3955 | Not<br>reported  | Not<br>reported  | 27    | RDT: 66 /<br>3955 (1.6<br>%)               | 2   | 58   |
| Littrell <i>et al.</i> ,<br>2013 [64]<br>Senegal            | 110                 | 1 (0.9)            | 90 (81.8<br>%)     | 5520 | 1021<br>(18.5 %) | 2782<br>(50.4 %) | 50    | RDT:<br>23/5520<br>(0.4 %)                 | 5   | 240  |
| Sturrock <i>et al.</i> ,                                    | 247                 | Not<br>reported    | 151<br>(61.1)      | 3671 | 163 (4.4<br>%)   | 2168<br>(59.1 %) | 15    | RDT:<br>74/3671                            | 3   | 50   |

|                                                   |    |                 |                 |     |                 |                 |     |                                                                              |   |    |
|---------------------------------------------------|----|-----------------|-----------------|-----|-----------------|-----------------|-----|------------------------------------------------------------------------------|---|----|
| 2013 [8],<br>Swaziland                            |    |                 |                 |     |                 |                 |     | (2.0 %)                                                                      |   |    |
| Rogawski <i>et al.</i> ,<br>2012 [65]<br>Thailand | 1  | Not<br>reported | Not<br>reported | 126 | Not<br>reported | Not<br>reported | 126 | Microscopy:<br>1/126 (0.8<br>%, Pf).<br>PCR: 2/126<br>(1.6 %, 1 Pf,<br>1 Pv) | 1 | 63 |
| Stresman <i>et al.</i> ,<br>2010 [66]<br>Zambia   | 23 | Not<br>reported | Not<br>reported | 186 | 46 (24.7<br>%)  | 86 (46.2<br>%)  | 8   | RDT: 5/185<br>(2.7 %).<br>PCR: 7/186<br>(3.4 %)                              | 5 | 37 |

**Pv: *Plasmodium vivax*; Pf: *Plasmodium falciparum*; RDT: Rapid Diagnostic Test; PCR: Polymerase Chain Reaction; LAMP: Loop - Mediated Isothermal Amplification**
